# Supplementary material
Source: PubMed Central journal article supplement (PMC3144090)
Supplement: supp_0022034510369304_JDR369304_Appendix.pdf [file supp_0022034510369304_JDR369304_Appendix.pdf]

## RESEARCH REPORTS

Biological

H. Cao<sup>1</sup>, J. Wang<sup>1</sup>, X. Li<sup>1</sup>, S. Florez<sup>1</sup>, Z. Huang<sup>1</sup>,  
S.R. Venugopalan<sup>1</sup>, S. Elangovan<sup>2</sup>, Z. Skobe<sup>2</sup>,  
H.C. Margolis<sup>2</sup>, J.F. Martin<sup>1</sup>, and B.A. Amendt<sup>1\*</sup>

# MicroRNAs Play a Critical Role in Tooth Development

<sup>1</sup>Institute of Biosciences and Technology, Texas A&M Health Science Center, 2121 W. Holcombe Boulevard, Houston, TX 77030, USA; and  
<sup>2</sup>Department of Biomineralization, The Forsyth Institute, Boston, MA, USA;  
\*corresponding authors, bamendt@ibt.tamhsc.edu

*J Dent Res* 89(8):779-784, 2010

## APPENDIX

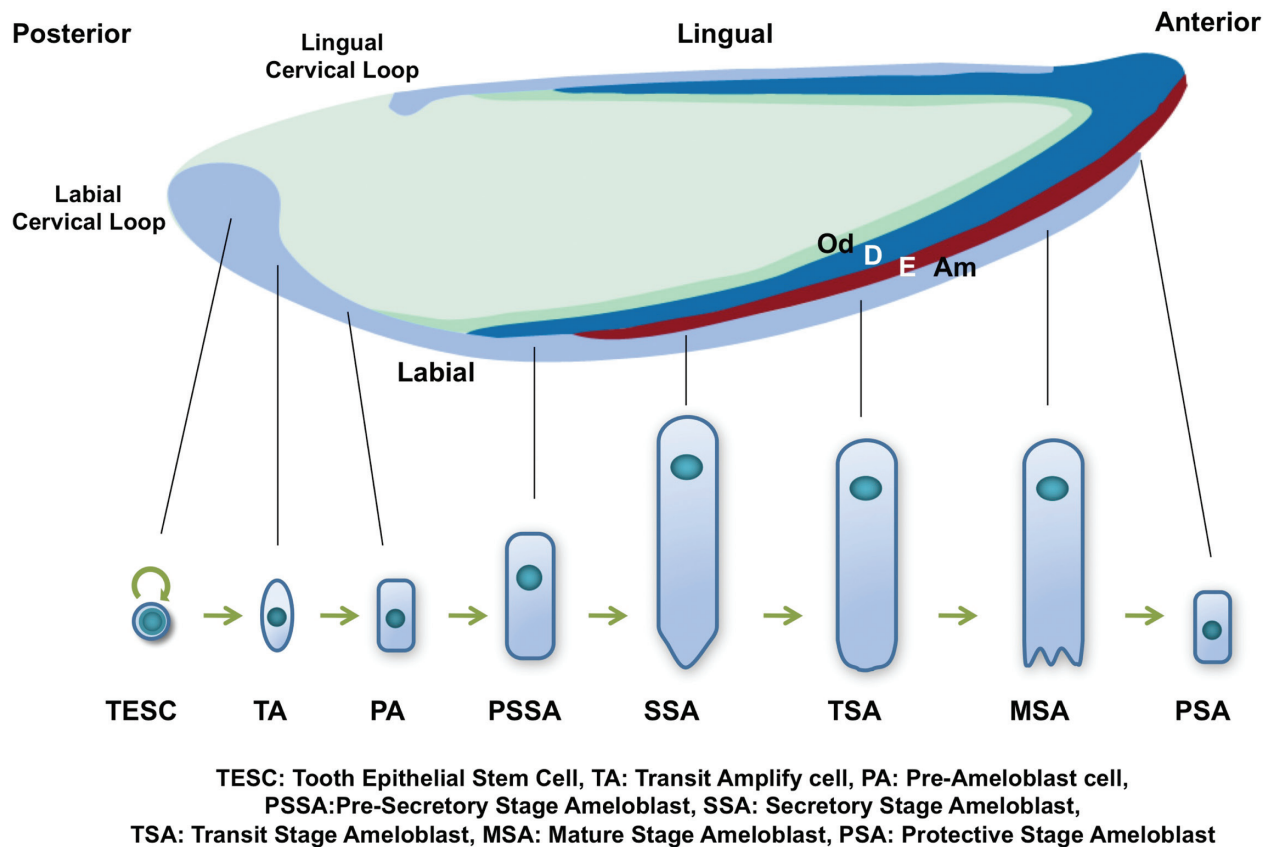

**Appendix Figure 1.** Schematic diagram of an adult incisor. Enamel (shown in red) and dentin (blue) are produced by ameloblasts and odontoblasts, respectively. Different from dentin, which is present at lingual and labial sides, enamel is present only on the labial side. There are different stages of cell differentiation present on the labial side: TESC, tooth epithelial stem cells; TA, transit-amplifying cells; PA, pre-ameloblast cells; PSSA, pre-secretory-stage ameloblasts; SSA, secretory-stage ameloblasts; TSA, transit-stage ameloblasts; MSA, mature-stage ameloblasts; PSA, protective-stage ameloblasts. The post-mitotic cells are from stages PSSA to PSA.

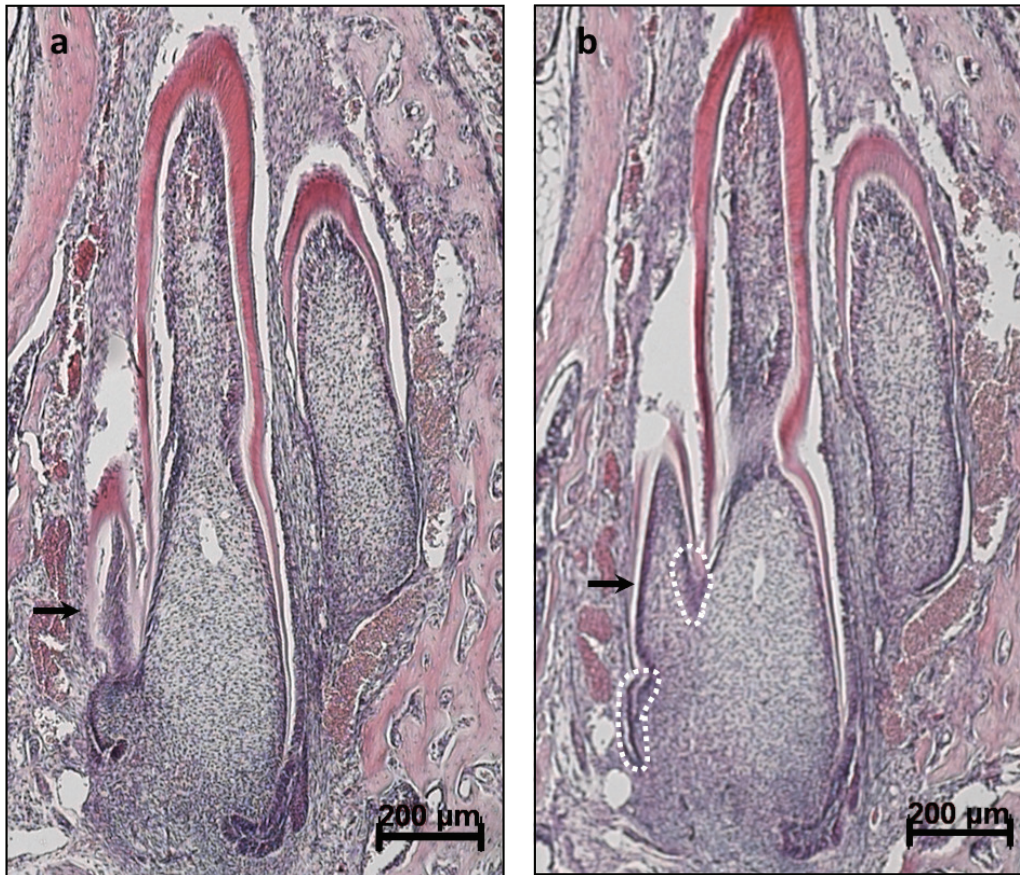

**Appendix Figure 2.** Branching of *Pitx2-Cre/Dicer1* cKO incisor. (a,b) Histology of 2 close sections of two-week-old *Pitx2-Cre/Dicer1* cKO heads. Note the extra incisor branching from the posterior end of one incisor (arrows). The potential new cervical loops are outlined by the white dotted line.

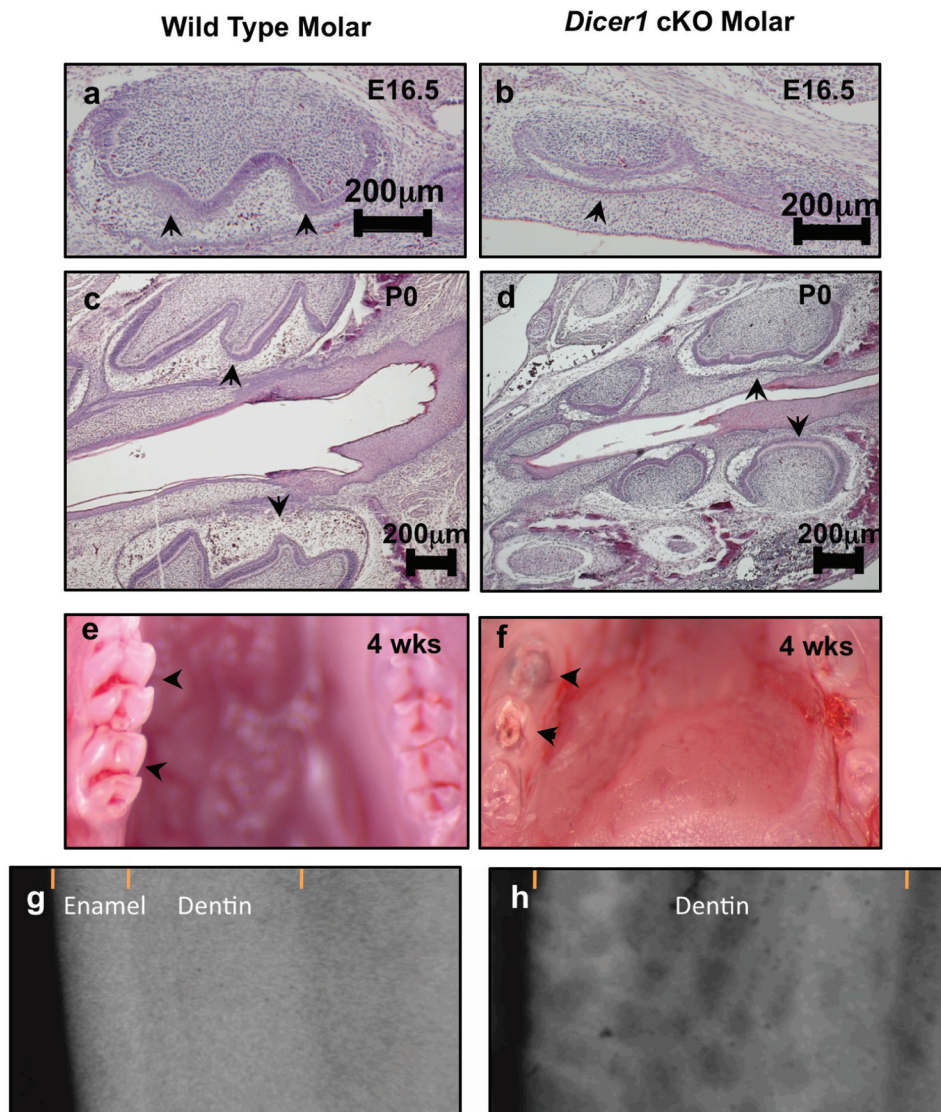

**Appendix Figure 3.** Severe molar defects in *Pitx2-Cre/Dicer1* cKO. **(a,b)** At E16.5, the molars are abnormally formed in the *Pitx2-Cre/Dicer1* cKO mouse. **(c,d)** In P0 *Pitx2-Cre/Dicer1* cKO, molar cusp formation was defective (arrows). Sagittal sections of newborn (P0) wild-type and *Pitx2-Cre/Dicer1* cKO heads. In the *Dicer1* cKO, molar morphology was severely disrupted, with no cusp formation and relatively small molar tooth germs (arrows). **(e,f)** In one-month-old mutant mice, the erupted molars were small and lacked the characteristic cusps of the WT mice. **(g,h)** X-ray microradiographs of three-month-old WT and *Dicer1* cKO incisors. *Dicer1* cKO have no enamel. Dentin deposition was also affected.

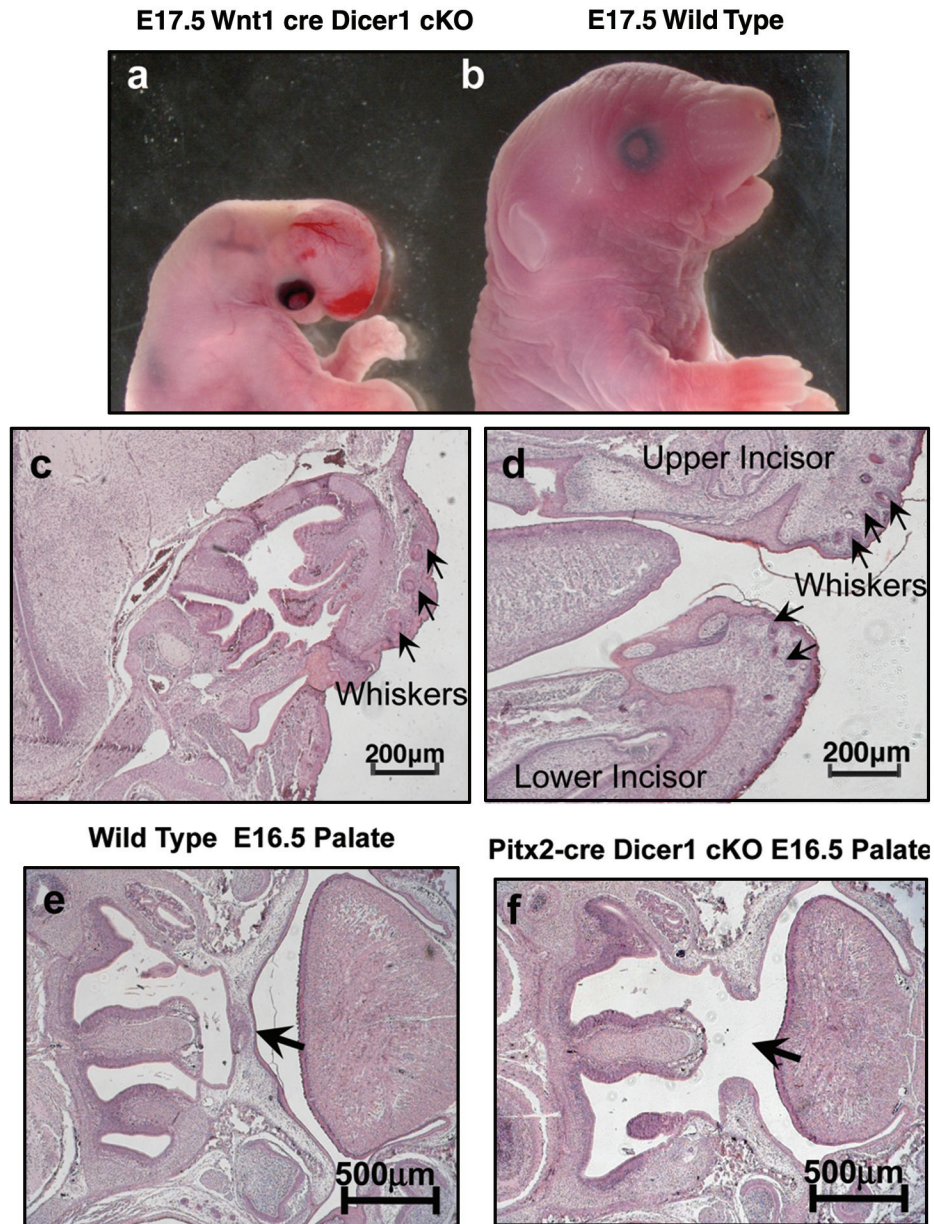

**Appendix Figure 4.** Severe craniofacial defects in *Wnt1-Cre/Dicer1* and *Pitx2-Cre/Dicer1* cKO. (a,b) At E17.5, *Wnt1-Cre/Dicer1* cKO had severe craniofacial defects. Mouth and nose structures are missing. In contrast, the brain is relatively expanded. (c,d) Sagittal sections of E17.5 *Wnt1-Cre/Dicer1* cKO and WT embryos, respectively. Upper jaw, lower jaw, tongue, and other structures are missing in the mutant mouse head. The major part of the head is brain tissue. Whiskers (arrows) are clearly formed in *Wnt1-Cre/Dicer1* cKO. (e,f) Coronal sections of E16.5 wild-type and *Pitx2-Cre/Dicer1* cKO heads. Cleft palate in *Pitx2-Cre/Dicer1* cKO (arrows).

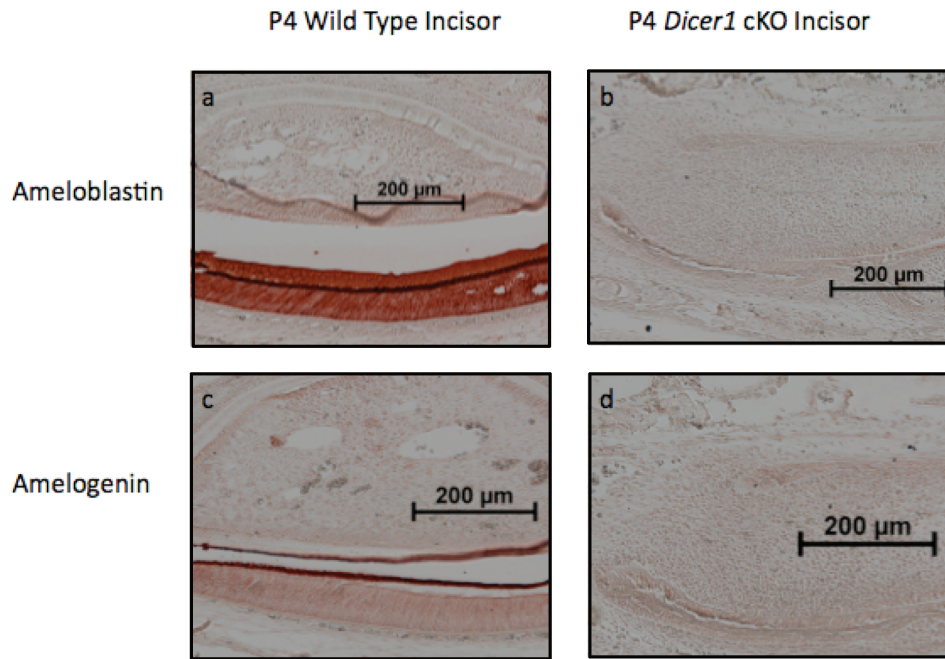

**Appendix Figure 5.** Ameloblast differentiation defect in P4 incisor. (a-d) Ameloblast differentiation markers observed by immunohistochemistry of P4 wild-type and *Pitx2-Cre/Dicer1* cKO lower incisors. Amelogenin and Ameloblastin. Note the dramatic decrease of amelogenin and ameloblastin in *Pitx2-Cre/Dicer1* cKO compared with WT.

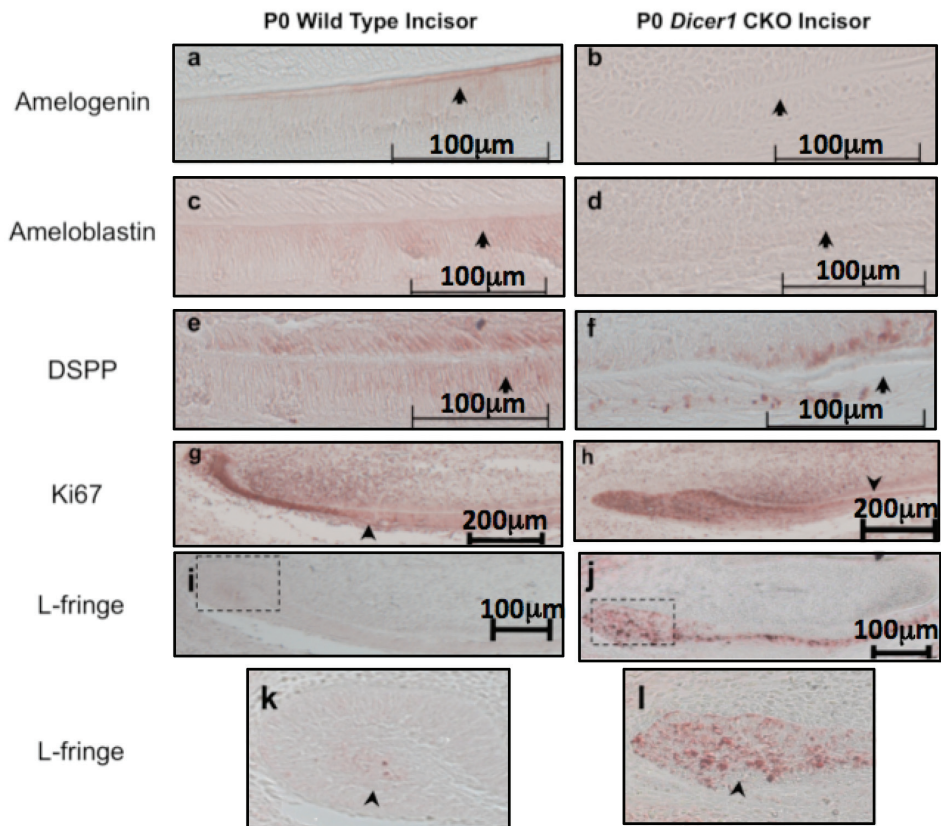

**Appendix Figure 6.** Ameloblast differentiation is repressed in the *Pitx2-Cre/Dicer1* cKO. (a-f) Higher-magnification pictures of the boxed region of Fig. 3 in the main article. (g,h) Ki67, a cell proliferation marker observed by immunohistochemistry of newborn (P0) wild-type and *Pitx2-Cre/Dicer1* cKO lower incisors. Epithelial stem cells, transit-amplifying cells, and pre-ameloblast cells are proliferative (Ki67-positive). After cells enter terminal differentiation, they become post-mitotic cells (arrows). In the *Pitx2-Cre/Dicer1* cKO, a similar pattern of Ki67 staining was observed compared with that in WT incisors. (i-l) Lunatic Fringe (L-fringe), an undifferentiated cell marker, was observed by immunohistochemistry of newborn (P0) lower incisors. Dramatic up-regulation of L-fringe in the *Pitx2-Cre/Dicer1* cKO incisor (arrows). Lunatic Fringe is present inside and outside of the cervical loop in *Pitx2-Cre/Dicer1* cKO incisor.

**Appendix Table.** MicroRNA Expression Profile of PO Incisor and Molar\*

| PO Incisor miRNAs | PO Molar         |           |                 |                  |           |
|-------------------|------------------|-----------|-----------------|------------------|-----------|
|                   | Signal Intensity | Frequency | miRNAs          | Signal Intensity | Frequency |
| mmu-miR-709       | 57,358.77        | 4.60%     | mmu-miR-709     | 49,495.29        | 4.05%     |
| mmu-miR-199a-3p   | 46,521.57        | 3.73%     | mmu-let-7a      | 44,593.04        | 3.65%     |
| mmu-let-7a        | 45,376.98        | 3.64%     | mmu-let-7f      | 41,739.87        | 3.41%     |
| mmu-let-7f        | 41,080.46        | 3.29%     | mmu-miR-203     | 41,524.82        | 3.40%     |
| mmu-miR-26a       | 40,591.04        | 3.26%     | mmu-let-7d      | 39,765.27        | 3.25%     |
| mmu-miR-214       | 38,074.63        | 3.05%     | mmu-let-7c      | 39,663.94        | 3.24%     |
| mmu-let-7d        | 37,884.85        | 3.04%     | mmu-miR-26a     | 36,084.15        | 2.95%     |
| mmu-let-7c        | 36,689.75        | 2.94%     | mmu-let-7b      | 35,016.12        | 2.86%     |
| mmu-let-7i        | 33,298.43        | 2.67%     | mmu-miR-23b     | 34,907.85        | 2.86%     |
| mmu-miR-23b       | 31,446.16        | 2.52%     | mmu-miR-125b-5p | 33,408.51        | 2.73%     |
| mmu-miR-23a       | 30,289.37        | 2.43%     | mmu-miR-23a     | 32,470.91        | 2.66%     |
| mmu-let-7b        | 30,241.70        | 2.43%     | mmu-miR-199a-3p | 30,565.13        | 2.50%     |
| mmu-miR-125b-5p   | 29,975.41        | 2.40%     | mmu-let-7e      | 30,472.45        | 2.49%     |
| mmu-let-7g        | 28,748.68        | 2.31%     | mmu-miR-214     | 28,147.74        | 2.30%     |
| mmu-let-7e        | 27,461.71        | 2.20%     | mmu-let-7i      | 25,645.36        | 2.10%     |
| mmu-miR-762       | 25,908.00        | 2.08%     | mmu-let-7g      | 23,732.31        | 1.94%     |
| mmu-miR-335-5p    | 23,711.76        | 1.90%     | mmu-miR-205     | 23,522.73        | 1.92%     |
| mmu-miR-26b       | 21,780.71        | 1.75%     | mmu-miR-26b     | 22,297.69        | 1.82%     |
| mmu-miR-126-3p    | 20,782.32        | 1.67%     | mmu-miR-762     | 18,533.31        | 1.52%     |
| mmu-miR-21        | 18,968.70        | 1.52%     | mmu-miR-200c    | 18,517.64        | 1.51%     |
| mmu-miR-181b      | 18,122.74        | 1.45%     | mmu-miR-200b    | 16,512.10        | 1.35%     |
| mmu-miR-690       | 17,372.58        | 1.39%     | mmu-miR-125a-5p | 15,618.24        | 1.28%     |
| mmu-miR-148a      | 17,159.70        | 1.38%     | mmu-miR-15b     | 15,537.65        | 1.27%     |
| mmu-miR-16        | 16,813.83        | 1.35%     | mmu-miR-30c     | 15,387.77        | 1.26%     |
| mmu-miR-1         | 16,554.61        | 1.33%     | mmu-miR-16      | 15,017.26        | 1.23%     |
| mmu-miR-206       | 16,396.95        | 1.32%     | mmu-miR-92a     | 14,976.83        | 1.23%     |
| mmu-miR-181a      | 16,237.82        | 1.30%     | mmu-miR-335-5p  | 14,934.37        | 1.22%     |
| mmu-miR-152       | 15,975.90        | 1.28%     | mmu-miR-30b     | 13,941.05        | 1.14%     |
| mmu-miR-27b       | 14,230.38        | 1.14%     | mmu-miR-206     | 13,421.63        | 1.10%     |
| mmu-miR-125a-5p   | 13,947.77        | 1.12%     | mmu-miR-181b    | 13,171.20        | 1.08%     |
| mmu-miR-181d      | 13,913.29        | 1.12%     | mmu-miR-27b     | 12,949.16        | 1.06%     |
| mmu-miR-30b       | 13,644.05        | 1.09%     | mmu-miR-126-3p  | 12,279.08        | 1.00%     |
| mmu-miR-705       | 13,238.12        | 1.06%     | mmu-miR-21      | 11,979.47        | 0.98%     |
| mmu-miR-30c       | 13,072.94        | 1.05%     | mmu-miR-1       | 11,780.26        | 0.96%     |
| mmu-miR-1224      | 12,536.62        | 1.01%     | mmu-miR-218     | 11,731.64        | 0.96%     |
| mmu-miR-24        | 12,252.04        | 0.98%     | mmu-miR-690     | 11,611.42        | 0.95%     |
| mmu-miR-218       | 12,011.71        | 0.96%     | mmu-miR-25      | 11,280.79        | 0.92%     |
| mmu-miR-27a       | 11,459.57        | 0.92%     | mmu-miR-98      | 11,208.67        | 0.92%     |
| mmu-miR-25        | 11,339.22        | 0.91%     | mmu-miR-181d    | 11,154.42        | 0.91%     |
| mmu-miR-92a       | 10,610.63        | 0.85%     | mmu-miR-183     | 9,796.57         | 0.80%     |
| mmu-miR-15b       | 10,040.89        | 0.81%     | mmu-miR-24      | 9,478.12         | 0.78%     |
| mmu-miR-20a       | 7,429.15         | 0.60%     | mmu-miR-181a    | 8,884.15         | 0.73%     |
| mmu-miR-140*      | 7,375.85         | 0.59%     | mmu-miR-705     | 8,748.92         | 0.72%     |
| mmu-miR-320       | 7,027.72         | 0.56%     | mmu-miR-27a     | 8,405.48         | 0.69%     |
| mmu-miR-98        | 6,994.34         | 0.56%     | mmu-miR-320     | 7,883.54         | 0.64%     |
| mmu-miR-145       | 6,692.53         | 0.54%     | mmu-miR-20a     | 7,469.63         | 0.61%     |
| mmu-miR-191       | 6,405.98         | 0.51%     | mmu-miR-92b     | 7,416.57         | 0.61%     |
| mmu-miR-199a-5p   | 6,175.63         | 0.50%     | mmu-miR-17      | 6,696.92         | 0.55%     |
| mmu-miR-574-5p    | 6,143.13         | 0.49%     | mmu-miR-191     | 6,690.83         | 0.55%     |
| mmu-miR-379       | 6,005.92         | 0.48%     | mmu-miR-152     | 6,533.26         | 0.53%     |
| mmu-miR-351       | 5,973.97         | 0.48%     | mmu-miR-1224    | 6,506.25         | 0.53%     |
| mmu-miR-17        | 5,799.50         | 0.47%     | mmu-miR-574-5p  | 6,378.28         | 0.52%     |
| mmu-miR-127       | 5,609.27         | 0.45%     | mmu-miR-31      | 6,306.61         | 0.52%     |
| mmu-miR-689       | 5,480.17         | 0.44%     | mmu-miR-182     | 6,163.93         | 0.50%     |
| mmu-miR-455       | 5,234.79         | 0.42%     | mmu-miR-145     | 6,133.06         | 0.50%     |
| mmu-miR-205       | 5,036.10         | 0.40%     | mmu-miR-361     | 5,277.36         | 0.43%     |
| mmu-miR-99b       | 4,995.07         | 0.40%     | mmu-miR-379     | 5,214.85         | 0.43%     |
| mmu-miR-151-5p    | 4,930.30         | 0.40%     | mmu-miR-127     | 5,037.86         | 0.41%     |
| mmu-miR-483       | 4,881.35         | 0.39%     | mmu-miR-805     | 4,966.63         | 0.41%     |
| mmu-miR-195       | 4,792.30         | 0.38%     | mmu-miR-455     | 4,945.18         | 0.40%     |
| mmu-miR-92b       | 4,460.00         | 0.36%     | mmu-miR-99a     | 4,868.79         | 0.40%     |
| mmu-miR-30d       | 4,270.40         | 0.34%     | mmu-miR-429     | 4,593.30         | 0.38%     |

(continued)

Appendix Table. (continued)

| PO Incisor miRNAs | PO Molar         |           |                 |                  |           |
|-------------------|------------------|-----------|-----------------|------------------|-----------|
|                   | Signal Intensity | Frequency | miRNAs          | Signal Intensity | Frequency |
| mmu-miR-361       | 4,038.43         | 0.32%     | mmu-miR-103     | 4,487.75         | 0.37%     |
| mmu-miR-199b*     | 3,993.12         | 0.32%     | mmu-miR-151-5p  | 4,463.77         | 0.37%     |
| mmu-miR-143       | 3,752.78         | 0.30%     | mmu-miR-100     | 4,425.64         | 0.36%     |
| mmu-miR-103       | 3,711.00         | 0.30%     | mmu-miR-148a    | 4,316.10         | 0.35%     |
| mmu-miR-30a       | 3,670.66         | 0.29%     | mmu-miR-99b     | 4,247.24         | 0.35%     |
| mmu-miR-1187      | 3,642.45         | 0.29%     | mmu-miR-107     | 4,201.16         | 0.34%     |
| mmu-miR-99a       | 3,595.25         | 0.29%     | mmu-miR-199a-5p | 4,011.84         | 0.33%     |
| mmu-miR-200c      | 3,573.82         | 0.29%     | mmu-miR-195     | 3,977.25         | 0.33%     |
| mmu-miR-322       | 3,540.56         | 0.28%     | mmu-miR-1187    | 3,909.27         | 0.32%     |
| mmu-miR-720       | 3,529.03         | 0.28%     | mmu-miR-434-3p  | 3,699.96         | 0.30%     |
| mmu-miR-100       | 3,515.71         | 0.28%     | mmu-miR-720     | 3,584.30         | 0.29%     |
| mmu-miR-107       | 3,421.59         | 0.27%     | mmu-miR-106a    | 3,411.52         | 0.28%     |
| mmu-miR-434-3p    | 3,401.53         | 0.27%     | mmu-miR-20b     | 3,233.92         | 0.26%     |
| mmu-miR-322*      | 3,327.74         | 0.27%     | mmu-miR-451     | 3,211.40         | 0.26%     |
| mmu-miR-133a      | 3,092.98         | 0.25%     | mmu-miR-30d     | 3,141.88         | 0.26%     |
| mmu-miR-20b       | 2,986.82         | 0.24%     | mmu-miR-1196    | 2,927.01         | 0.24%     |
| mmu-miR-450a-5p   | 2,984.34         | 0.24%     | mmu-miR-30a     | 2,810.79         | 0.23%     |
| mmu-miR-133b      | 2,964.65         | 0.24%     | mmu-miR-130a    | 2,802.35         | 0.23%     |
| mmu-miR-29a       | 2,597.96         | 0.21%     | mmu-miR-199b*   | 2,755.91         | 0.23%     |
| mmu-miR-1196      | 2,574.84         | 0.21%     | mmu-miR-382     | 2,701.42         | 0.22%     |
| mmu-miR-106a      | 2,487.67         | 0.20%     | mmu-miR-351     | 2,679.63         | 0.22%     |
| mmu-miR-382       | 2,459.19         | 0.20%     | mmu-miR-106b    | 2,445.75         | 0.20%     |
| mmu-miR-106b      | 2,396.09         | 0.19%     | mmu-miR-93      | 2,344.24         | 0.19%     |
| mmu-miR-451       | 2,257.03         | 0.18%     | mmu-miR-423-5p  | 2,203.67         | 0.18%     |
| mmu-miR-200b      | 2,248.28         | 0.18%     | mmu-miR-140*    | 2,125.19         | 0.17%     |
| mmu-miR-15a       | 2,238.54         | 0.18%     | mmu-miR-674     | 2,087.04         | 0.17%     |
| mmu-miR-181c      | 2,210.09         | 0.18%     | mmu-miR-143     | 1,928.74         | 0.16%     |
| mmu-miR-423-5p    | 2,151.57         | 0.17%     | mmu-miR-342-3p  | 1,877.78         | 0.15%     |
| mmu-miR-411*      | 2,086.59         | 0.17%     | mmu-miR-1195    | 1,854.08         | 0.15%     |
| mmu-miR-203       | 1,958.50         | 0.16%     | mmu-miR-322*    | 1,715.93         | 0.14%     |
| mmu-miR-93        | 1,952.39         | 0.16%     | mmu-miR-374     | 1,680.16         | 0.14%     |
| mmu-miR-674       | 1,885.90         | 0.15%     | mmu-miR-483     | 1,597.60         | 0.13%     |
| mmu-miR-805       | 1,885.05         | 0.15%     | mmu-miR-433     | 1,574.93         | 0.13%     |
| mmu-miR-130a      | 1,848.24         | 0.15%     | mmu-miR-411*    | 1,557.86         | 0.13%     |
| mmu-miR-495       | 1,811.41         | 0.15%     | mmu-miR-15a     | 1,498.46         | 0.12%     |
| mmu-miR-342-3p    | 1,762.59         | 0.14%     | mmu-miR-19b     | 1,439.32         | 0.12%     |
| mmu-miR-574-3p    | 1,705.37         | 0.14%     | mmu-miR-322     | 1,393.30         | 0.11%     |
| mmu-miR-378       | 1,704.47         | 0.14%     | mmu-miR-676     | 1,369.82         | 0.11%     |
| mmu-miR-467f      | 1,500.58         | 0.12%     | mmu-miR-689     | 1,367.57         | 0.11%     |
| mmu-miR-128       | 1,497.00         | 0.12%     | mmu-miR-181c    | 1,285.33         | 0.11%     |
| mmu-miR-433       | 1,464.25         | 0.12%     | mmu-miR-128     | 1,271.65         | 0.10%     |
| mmu-miR-329       | 1,440.03         | 0.12%     | mmu-miR-329     | 1,236.64         | 0.10%     |
| mmu-miR-223       | 1,349.03         | 0.11%     | mmu-miR-200a    | 1,225.74         | 0.10%     |
| mmu-miR-183       | 1,342.78         | 0.11%     | mmu-miR-495     | 1,216.89         | 0.10%     |
| mmu-miR-19b       | 1,261.89         | 0.10%     | mmu-miR-134     | 1,191.72         | 0.10%     |
| mmu-miR-466f-3p   | 1,245.63         | 0.10%     | mmu-miR-133a    | 1,145.31         | 0.09%     |
| mmu-miR-30e       | 1,133.69         | 0.09%     | mmu-miR-133b    | 1,122.11         | 0.09%     |
| mmu-miR-185       | 1,132.73         | 0.09%     | mmu-miR-671-5p  | 1,053.35         | 0.09%     |
| mmu-miR-182       | 1,087.28         | 0.09%     | mmu-miR-151-3p  | 1,043.82         | 0.09%     |
| mmu-miR-299*      | 1,053.09         | 0.08%     | mmu-miR-376b    | 1,024.15         | 0.08%     |
| mmu-miR-466i      | 1,023.06         | 0.08%     | mmu-miR-541     | 975.77           | 0.08%     |
| mmu-miR-151-3p    | 1,020.94         | 0.08%     | mmu-miR-340-5p  | 947.00           | 0.08%     |
| mmu-miR-676       | 979.76           | 0.08%     | mmu-miR-574-3p  | 946.85           | 0.08%     |
| mmu-miR-31        | 932.54           | 0.07%     | mmu-miR-30e     | 912.85           | 0.07%     |
| mmu-miR-376b      | 911.74           | 0.07%     | mmu-miR-299*    | 896.74           | 0.07%     |
| mmu-miR-374       | 883.61           | 0.07%     | mmu-miR-130b    | 877.64           | 0.07%     |
| mmu-miR-487b      | 844.41           | 0.07%     | mmu-miR-185     | 872.77           | 0.07%     |
| mmu-miR-671-5p    | 802.21           | 0.06%     | mmu-miR-378     | 865.40           | 0.07%     |
| mmu-miR-134       | 788.30           | 0.06%     | mmu-miR-450a-5p | 841.83           | 0.07%     |
| mmu-miR-1195      | 776.10           | 0.06%     | mmu-miR-708     | 829.82           | 0.07%     |
| mmu-miR-340-5p    | 766.99           | 0.06%     | mmu-miR-467f    | 805.81           | 0.07%     |

\* Frequency: the percentages of individual microRNA signal intensity among total microRNA signal intensities.
